# Supplementary material for: Oil degradation potential of microbial communities in water and sediment of Baltic Sea coastal area
Source: PubMed Central journal article supplement (PMC6605675; doi:10.1371/journal.pone.0218834), 2019-07-02
Supplement: pone.0218834.s001.pdf [file pone.0218834.s001.pdf]

**S1 Table. Number of bacterial and archaeal 16S rRNA and fungal 5.8S rRNA gene copies from sea water.** Copy numbers determined by qPCR from triplicate DNA extractions.

| Site         | Bacteria                        |          | Archaea                         |          | Fungi                           |          |
|--------------|---------------------------------|----------|---------------------------------|----------|---------------------------------|----------|
|              | Copy number<br>mL <sup>-1</sup> | SD       | Copy number<br>mL <sup>-1</sup> | SD       | Copy number<br>mL <sup>-1</sup> | SD       |
| Porvoo Q     | 1.13E+07                        | 1.22E+06 | 4.18E+05                        | 3.13E+04 | 3.61E+03                        | 1.18E+03 |
| Porvoo D     | 1.23E+07                        | 2.63E+06 | 3.96E+05                        | 4.80E+04 | 2.16E+03                        | 1.72E+03 |
| Porvoo B     | 1.18E+07                        | 6.48E+06 | 3.99E+05                        | 2.62E+05 | 7.23E+03                        | 4.86E+03 |
| Naantali PP  | 2.05E+07                        | 2.67E+06 | 9.66E+05                        | 1.99E+05 | 8.49E+03                        | 9.17E+02 |
| Naantali 300 | 2.36E+07                        | 6.12E+06 | 9.04E+05                        | 6.99E+04 | 2.23E+04                        | 6.77E+02 |
