# Supplementary material for: Oil degradation potential of microbial communities in water and sediment of Baltic Sea coastal area
Source: PubMed Central journal article supplement (PMC6605675; doi:10.1371/journal.pone.0218834), 2019-07-02
Supplement: pone.0218834.s002.pdf [file pone.0218834.s002.pdf]

**S2 Table. Number of bacterial and archaeal 16S rRNA and fungal 5.8S rRNA gene copies.**

Copy numbers determined by qPCR from triplicate DNA extractions from untreated sediment or sediment treated with DNase.

| Site         | Bacteria sediment              |          | Bacteria DNase treated sediment |          | Archaea sediment               |          | Archaea DNase treated sediment |          | Fungi sediment                 |          | Fungi DNase treated sediment   |          |
|--------------|--------------------------------|----------|---------------------------------|----------|--------------------------------|----------|--------------------------------|----------|--------------------------------|----------|--------------------------------|----------|
|              | Copy number g <sup>-1</sup> dw | SD       | Copy number g <sup>-1</sup> dw  | SD       | Copy number g <sup>-1</sup> dw | SD       | Copy number g <sup>-1</sup> dw | SD       | Copy number g <sup>-1</sup> dw | SD       | Copy number g <sup>-1</sup> dw | SD       |
| Porvoo Q     | 2.67E+10                       | 3.28E+09 | 2.23E+09                        | 1.24E+09 | 9.56E+08                       | 1.77E+08 | 7.83E+07                       | 4.33E+07 | 1.40E+07                       | 4.66E+06 | 1.76E+06                       | 6.65E+05 |
| Porvoo D     | 2.15E+10                       | 8.81E+09 | 2.04E+09                        | 7.19E+08 | 1.49E+09                       | 5.53E+08 | 1.42E+08                       | 2.21E+07 | 4.38E+06                       | 1.98E+06 | 1.97E+06                       | 7.17E+05 |
| Porvoo B     | 5.84E+10                       | 8.31E+09 | 1.03E+10                        | 4.65E+09 | 3.34E+09                       | 1.08E+08 | 1.77E+08                       | 6.08E+07 | 4.93E+07                       | 6.61E+06 | 1.38E+07                       | 5.00E+06 |
| Naantali PP  | 3.86E+09                       | 3.18E+09 | 4.21E+07                        | 2.20E+07 | 2.24E+08                       | 2.03E+08 | 3.69E+06                       | 1.48E+06 | 1.04E+06                       | 7.54E+05 | < 1.0E+06                      |          |
| Naantali 300 | 5.61E+09                       | 2.93E+08 | 3.43E+08                        | 3.69E+07 | 2.56E+08                       | 2.35E+07 | 9.20E+06                       | 1.93E+06 | 5.64E+06                       | 1.38E+06 | < 1.0E+06                      |          |
