# Supplementary material for: Oil degradation potential of microbial communities in water and sediment of Baltic Sea coastal area
Source: PubMed Central journal article supplement (PMC6605675; doi:10.1371/journal.pone.0218834), 2019-07-02
Supplement: pone.0218834.s003.pdf [file pone.0218834.s003.pdf]

**S3 Table. Number of PAH-RHD<sub>α</sub> Gram-negative (GN), Gram-positive (GP) and *alkB* genes copies in water samples.**

Copy numbers determined by qPCR from triplicate DNA and RNA sample extractions.

| Site         | GN, DNA                      |          | GN, RNA                      |    | GP, DNA                      |          | GP, RNA                      |          | <i>alkB</i> , DNA            |          | <i>alkB</i> , RNA            |          |
|--------------|------------------------------|----------|------------------------------|----|------------------------------|----------|------------------------------|----------|------------------------------|----------|------------------------------|----------|
|              | Copy number mL <sup>-1</sup> | SD       | Copy number mL <sup>-1</sup> | SD | Copy number mL <sup>-1</sup> | SD       | Copy number mL <sup>-1</sup> | SD       | Copy number mL <sup>-1</sup> | SD       | Copy number mL <sup>-1</sup> | SD       |
| Porvoo Q     | 2.07E+04                     | 3.85E+03 | <5.0E+01                     |    | 4.20E+04                     | 5.43E+03 | 1.24E+02                     | 1.89E+01 | 1.15E+04                     | 1.07E+03 | 1.11E+02                     | 1.97E+01 |
| Porvoo D     | 1.54E+04                     | 2.12E+03 | <5.0E+01                     |    | 3.96E+04                     | 1.68E+04 | < 4.0E+01                    |          | 9.91E+03                     | 1.27E+03 | < 4.0E+01                    |          |
| Porvoo B     | 1.50E+04                     | 1.06E+04 | <5.0E+01                     |    | 2.89E+04                     | 1.32E+04 | < 4.0E+01                    |          | 7.46E+03                     | 2.57E+03 | < 4.0E+01                    |          |
| Naantali PP  | 5.53E+04                     | 3.70E+04 | <5.0E+01                     |    | 5.76E+04                     | 4.65E+03 | < 4.0E+01                    |          | 2.05E+04                     | 5.54E+03 | < 4.0E+01                    |          |
| Naantali 300 | 3.54E+05                     | 4.22E+05 | <5.0E+01                     |    | 5.61E+04                     | 2.80E+04 | 8.80E+01                     | 1.18E+01 | 1.85E+04                     | 6.78E+03 | 3.15E+02                     | 1.69E+01 |
