# Supplementary material for: Oil degradation potential of microbial communities in water and sediment of Baltic Sea coastal area
Source: PubMed Central journal article supplement (PMC6605675; doi:10.1371/journal.pone.0218834), 2019-07-02
Supplement: pone.0218834.s004.pdf [file pone.0218834.s004.pdf]

**S4 Table. Number of PAH-RHD<sub>α</sub> Gram-negative (GN), Gram-positive (GP), *alkB* and bacterial 16S rRNA genes copies in sediment or sediment treated with DNase.**

Copy numbers determined by qPCR from triplicate DNA extractions.

| Site         | GN, sediment                   |          | GN, DNase treated sediment     |          | GP, sediment                   |          | GP, DNase treated sediment     |          | <i>alkB</i> , sediment         |          | <i>alkB</i> , DNase treated sediment |          |
|--------------|--------------------------------|----------|--------------------------------|----------|--------------------------------|----------|--------------------------------|----------|--------------------------------|----------|--------------------------------------|----------|
|              | Copy number g <sup>-1</sup> dw | SD       | Copy number g <sup>-1</sup> dw | SD       | Copy number g <sup>-1</sup> dw | SD       | Copy number g <sup>-1</sup> dw | SD       | Copy number g <sup>-1</sup> dw | SD       | Copy number g <sup>-1</sup> dw       | SD       |
| Porvoo Q     | 1.72E+06                       | 2.96E+05 | 2.63E+05                       | 1.53E+05 | 2.36E+06                       | 7.78E+05 | 3.47E+05                       | 1.92E+05 | 1.07E+07                       | 1.11E+06 | 9.95E+05                             | 7.00E+05 |
| Porvoo D     | 1.06E+06                       | 2.34E+05 | 2.35E+05                       | 5.29E+04 | 2.60E+06                       | 1.42E+06 | 3.45E+05                       | 2.55E+04 | 6.47E+06                       | 2.30E+06 | 7.11E+05                             | 2.62E+05 |
| Porvoo B     | 1.21E+06                       | 2.66E+05 | 9.69E+05                       | 3.25E+05 | 2.87E+06                       | 1.29E+06 | 1.31E+06                       | 6.11E+05 | 4.34E+07                       | 8.50E+06 | 3.96E+06                             | 2.26E+06 |
| Naantali PP  | 3.86E+05                       | 2.06E+05 | 7.30E+03                       | 2.72E+03 | 6.12E+05                       | 4.65E+05 | 8.83E+03                       | 7.85E+03 | 1.88E+06                       | 1.71E+06 | 2.16E+04                             | 1.54E+04 |
| Naantali 300 | 6.95E+05                       | 9.15E+04 | 3.66E+04                       | 6.67E+03 | 7.70E+05                       | 2.23E+05 | 6.57E+04                       | 1.72E+04 | 2.70E+06                       | 3.92E+05 | 1.89E+05                             | 5.03E+03 |
