# Supplementary material for: Oil degradation potential of microbial communities in water and sediment of Baltic Sea coastal area
Source: PubMed Central journal article supplement (PMC6605675; doi:10.1371/journal.pone.0218834), 2019-07-02
Supplement: pone.0218834.s005.pdf [file pone.0218834.s005.pdf]

**S5 Table. Amount of extracted DNA from untreated and DNase-treated sediment samples.**  
 On the right percent (%) of DNA left after DNase treatment compared to untreated DNA extractions, analysed from triplicate samples.

| Site        | DNA<br>ng g <sup>-1</sup> dw | DNA after DNase treatment<br>ng g <sup>-1</sup> dw | % of DNase treated DNA<br>from untreated DNA |
|-------------|------------------------------|----------------------------------------------------|----------------------------------------------|
| Porvoo Q    | 8.6                          | 0.6                                                | 7.2                                          |
|             | 10.5                         | 0.6                                                | 5.4                                          |
|             | 10.4                         | 1.4                                                | 13.4                                         |
| Porvoo D    | 17.2                         | 1.4                                                | 8.1                                          |
|             | 10.5                         | 1.5                                                | 14.3                                         |
|             | 12.2                         | 2.0                                                | 16.3                                         |
| Porvoo B    | 19.4                         | 1.9                                                | 9.6                                          |
|             | 20.3                         | 1.9                                                | 9.2                                          |
|             | 19.4                         | 0.8                                                | 4.3                                          |
| Naantali PP | 5.9                          | 0.05                                               | 0.8                                          |
|             | 2.5                          | 0.07                                               | 2.9                                          |
|             | 0.9                          | 0                                                  | 0.0                                          |
| Naatali 300 | 4.1                          | 0.1                                                | 3.2                                          |
|             | 3.2                          | 0.2                                                | 5.5                                          |
|             | 3.6                          | 0.2                                                | 4.7                                          |
