# Supplementary material for: Oil degradation potential of microbial communities in water and sediment of Baltic Sea coastal area
Source: PubMed Central journal article supplement (PMC6605675; doi:10.1371/journal.pone.0218834), 2019-07-02
Supplement: pone.0218834.s006.pdf [file pone.0218834.s006.pdf]

**S6 Table. Average number of identified sequence reads, identified OTUs, estimated OTU richness (Chao1) and Shannon diversity index calculated for the bacterial, archaeal and fungal communities.**

|                 | Sample type    | Number of sequences |       | Number of OTUs |       | Chao1 |       | Shannon |      |
|-----------------|----------------|---------------------|-------|----------------|-------|-------|-------|---------|------|
| <b>Bacteria</b> |                |                     |       |                |       |       |       |         |      |
| Naantali 300    | Water RNA      | 5686                | ±6370 | 3056           | ±3077 | 9958  | ±9583 | 10.3    | ±1.0 |
|                 | Water DNA      | 3046                | ±1790 | 1655           | ±797  | 5707  | ±3380 | 9.7     | ±0.4 |
|                 | Sediment       | 3184                | ±2745 | 1869           | ±1608 | 6236  | ±5380 | 8.3     | ±4.1 |
|                 | Sediment DNase | 2931                | ±1139 | 1374           | ±410  | 4186  | ±1094 | 9.4     | ±0.3 |
| Naantali PP     | Water RNA      | 6067                | ±5057 | 3728           | ±2834 | 13328 | ±8841 | 10.7    | ±1.2 |
|                 | Water DNA      | 2729                | ±506  | 1620           | ±302  | 5678  | ±1379 | 9.7     | ±0.4 |
|                 | Sediment       | 9379                | ±8822 | 4214           | ±3177 | 11486 | ±7262 | 10.8    | ±0.7 |
|                 | Sediment DNase | 2011                | ±1423 | 978            | ±603  | 2625  | ±1197 | 9.0     | ±0.9 |
| Porvoo B        | Water RNA      | 2394                | ±398  | 1617           | ±196  | 5138  | ±200  | 10.2    | ±0.1 |
|                 | Water DNA      | 2134                | ±165  | 1168           | ±151  | 3803  | ±400  | 9.2     | ±0.4 |
|                 | Sediment       | 14370               | ±1614 | 6890           | ±796  | 24688 | ±3134 | 11.1    | ±0.1 |
|                 | Sediment DNase | 6013                | ±875  | 2501           | ±284  | 9852  | ±1508 | 9.5     | ±0.1 |
| Porvoo D        | Water RNA      | 2100                | ±339  | 1488           | ±212  | 5424  | ±690  | 10.1    | ±0.2 |
|                 | Water DNA      | 2331                | ±680  | 1419           | ±315  | 4704  | ±808  | 9.8     | ±0.2 |
|                 | Sediment       | 5592                | ±1597 | 3241           | ±718  | 10270 | ±2261 | 10.9    | ±0.2 |
|                 | Sediment DNase | 6300                | ±2096 | 2980           | ±875  | 9582  | ±2460 | 10.3    | ±0.3 |
| Porvoo Q        | Water RNA      | 2308                | ±347  | 1632           | ±148  | 5911  | ±633  | 10.2    | ±0.1 |
|                 | Water DNA      | 2278                | ±813  | 1403           | ±478  | 4781  | ±1721 | 9.7     | ±0.4 |
|                 | Sediment       | 4847                | ±2236 | 2634           | ±1124 | 8070  | ±3145 | 10.5    | ±0.6 |
|                 | Sediment DNase | 6070                | ±386  | 2774           | ±201  | 8871  | ±1265 | 10.2    | ±0.1 |
| <b>Archaea</b>  |                |                     |       |                |       |       |       |         |      |
| Naantali 300    | Water RNA      | 10205               | ±4312 | 3039           | ±867  | 6471  | ±1695 | 10.1    | ±0.2 |
|                 | Water DNA      | 1723                | ±118  | 1044           | ±64   | 2778  | ±276  | 9.4     | ±0.1 |
|                 | Sediment       | 24                  | ±13   |                |       |       |       |         |      |
|                 | Sediment DNase | 4                   | ±2    |                |       |       |       |         |      |
| Naantali PP     | Water RNA      | 14639               | ±6603 | 3857           | ±1171 | 8115  | ±2297 | 10.2    | ±0.2 |
|                 | Water DNA      | 3076                | ±327  | 1550           | ±143  | 3908  | ±435  | 9.7     | ±0.1 |
|                 | Sediment       | 6716                | ±4591 | 1534           | ±847  | 3068  | ±1411 | 8.4     | ±0.5 |
|                 | Sediment DNase | 45                  | ±33   | 28             | ±14   | 62    | ±21   | 4.4     | ±0.5 |
| Porvoo B        | Water RNA      | 6002                | ±377  | 2059           | ±47   | 4335  | ±147  | 9.8     | ±0.0 |
|                 | Water DNA      | 1260                | ±149  | 747            | ±68   | 2068  | ±193  | 8.9     | ±0.1 |
|                 | Sediment       | 29                  | ±11   |                |       |       |       |         |      |
|                 | Sediment DNase | 6                   | ±3    |                |       |       |       |         |      |
| Porvoo D        | Water RNA      | 7663                | ±2236 | 2552           | ±475  | 5707  | ±640  | 10.0    | ±0.1 |
|                 | Water DNA      | 2344                | ±407  | 1214           | ±134  | 3164  | ±305  | 9.4     | ±0.1 |
|                 | Sediment       | 17158               | ±2959 | 3740           | ±379  | 7211  | ±700  | 9.3     | ±0.2 |
|                 | Sediment DNase | 3471                | ±834  | 733            | ±120  | 1648  | ±130  | 6.8     | ±0.1 |
| Porvoo Q        | Water RNA      | 6916                | ±1545 | 2341           | ±331  | 5406  | ±498  | 9.9     | ±0.1 |
|                 | Water DNA      | 2377                | ±660  | 1193           | ±256  | 3246  | ±697  | 9.3     | ±0.2 |
|                 | Sediment       | 9071                | ±3384 | 2139           | ±608  | 4301  | ±1010 | 8.6     | ±0.3 |
|                 | Sediment DNase | 1203                | ±1233 | 306            | ±241  | 732   | ±455  | 6.3     | ±0.5 |

|              | Sample type    | Number of sequences |        | Number of OTUs |       | Chao1 |       | Shannon |      |
|--------------|----------------|---------------------|--------|----------------|-------|-------|-------|---------|------|
| <b>Fungi</b> |                |                     |        |                |       |       |       |         |      |
| Naantali 300 | Water RNA      | 4887                | ±684   | 991            | ±53   | 2126  | ±153  | 7.5     | ±0.0 |
|              | Water DNA      | 3241                | ±321   | 851            | ±72   | 1832  | ±213  | 7.7     | ±0.2 |
|              | Sediment       | 2335                | ±275   | 465            | ±23   | 947   | ±87   | 7.0     | ±0.1 |
|              | Sediment DNase | 1417                | ±256   | 169            | ±19   | 364   | ±41   | 5.5     | ±0.2 |
| Naantali PP  | Water RNA      | 5614                | ±872   | 920            | ±86   | 1982  | ±244  | 6.6     | ±0.3 |
|              | Water DNA      | 12316               | ±2813  | 1989           | ±361  | 3975  | ±719  | 8.2     | ±0.3 |
|              | Sediment       | 3516                | ±1209  | 424            | ±125  | 858   | ±237  | 6.3     | ±0.1 |
|              | Sediment DNase | 2496                | ±964   | 143            | ±48   | 337   | ±88   | 3.7     | ±0.6 |
| Porvoo B     | Water RNA      | 3988                | ±665   | 1061           | ±143  | 2265  | ±395  | 8.0     | ±0.1 |
|              | Water DNA      | 2126                | ±386   | 410            | ±11   | 968   | ±114  | 4.7     | ±0.4 |
|              | Sediment       | 1948                | ±102   | 522            | ±17   | 1495  | ±284  | 6.6     | ±0.1 |
|              | Sediment DNase | 1322                | ±191   | 379            | ±7    | 925   | ±61   | 6.7     | ±0.1 |
| Porvoo D     | Water RNA      | 3623                | ±609   | 969            | ±92   | 2150  | ±244  | 8.0     | ±0.0 |
|              | Water DNA      | 2318                | ±129   | 519            | ±39   | 1355  | ±76   | 5.5     | ±0.5 |
|              | Sediment       | 6528                | ±286   | 1030           | ±102  | 2341  | ±329  | 6.9     | ±0.6 |
|              | Sediment DNase | 4337                | ±1046  | 758            | ±59   | 1776  | ±184  | 7.0     | ±0.3 |
| Porvoo Q     | Water RNA      | 5086                | ±623   | 1247           | ±114  | 2736  | ±254  | 8.2     | ±0.2 |
|              | Water DNA      | 2690                | ±569   | 520            | ±88   | 1219  | ±247  | 5.1     | ±0.3 |
|              | Sediment       | 12443               | ±12919 | 1673           | ±1215 | 3560  | ±2135 | 7.5     | ±0.3 |
|              | Sediment DNase | 3446                | ±367   | 685            | ±60   | 1695  | ±94   | 6.7     | ±0.5 |

| <b>Site</b>        | <b>DNA<br/>(ng g<sup>-1</sup> dw)</b> | <b>DNA after DNase<br/>treatment<br/>(ng g<sup>-1</sup> dw)</b> | <b>DNA left after DNase<br/>treatment (%)</b> |
|--------------------|---------------------------------------|-----------------------------------------------------------------|-----------------------------------------------|
| <b>Porvoo Q</b>    | 8.6                                   | 0.6                                                             | 7.2                                           |
|                    | 10.5                                  | 0.6                                                             | 5.4                                           |
|                    | 10.4                                  | 1.4                                                             | 13.4                                          |
| <b>Porvoo D</b>    | 17.2                                  | 1.4                                                             | 8.1                                           |
|                    | 10.5                                  | 1.5                                                             | 14.3                                          |
|                    | 12.2                                  | 2.0                                                             | 16.3                                          |
| <b>Porvoo B</b>    | 19.4                                  | 1.9                                                             | 9.6                                           |
|                    | 20.3                                  | 1.9                                                             | 9.2                                           |
|                    | 19.4                                  | 0.8                                                             | 4.3                                           |
| <b>Naantali PP</b> | 5.9                                   | 0.05                                                            | 0.8                                           |
|                    | 2.5                                   | 0.07                                                            | 2.9                                           |
|                    | 0.9                                   | 0                                                               | 0.0                                           |
| <b>Naatali 300</b> | 4.1                                   | 0.1                                                             | 3.2                                           |
|                    | 3.2                                   | 0.2                                                             | 5.5                                           |
|                    | 3.6                                   | 0.2                                                             | 4.7                                           |
